# Supplementary material
Source: PubMed Central journal article supplement (PMC6388688)
Supplement: NIHMS1009273-supplement-Supporting_Information.pdf [file NIHMS1009273-supplement-Supporting_Information.pdf]

**Decreased Cannabinoid CB<sub>1</sub> Receptors in Male Tobacco Smokers  
Examined with Positron Emission Tomography**

*Supplemental Information*

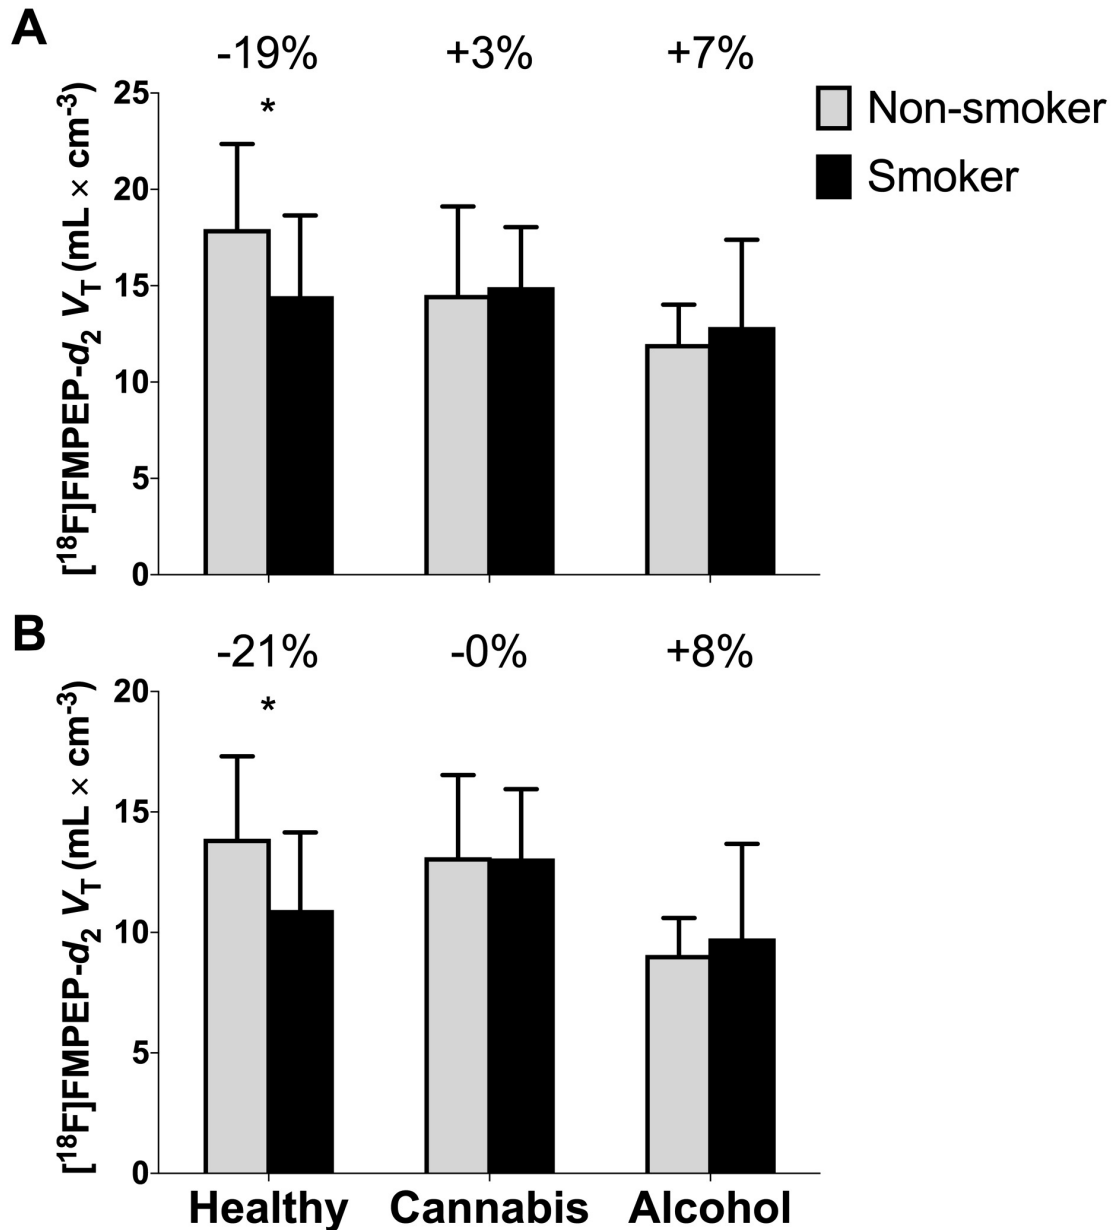

**Supplemental Figure S1:** Average of cortical (panel A) and subcortical (B) volumes of distribution ( $V_T$ ) of [<sup>18</sup>F]FMPEP-*d*<sub>2</sub> in healthy subjects (N=46), cannabis users (N=30), and patients with alcohol dependence (N=18). Values are adjusted to an average BMI of 26.8 kg/m<sup>2</sup>. \*p<0.05, t-test of adjusted  $V_T$  values. Data from cannabis users and patients with alcohol dependence from previously published work (1, 2).

**Supplemental References**

1. Hirvonen, J, Goodwin, RS, Li, CT, Terry, GE, Zoghbi, SS, Morse, C, *et al.* (2012): Reversible and regionally selective downregulation of brain cannabinoid CB1 receptors in chronic daily cannabis smokers. *Molecular Psychiatry* 17(6):642-9.
2. Hirvonen, J, Zanotti-Fregonara, P, Umhau, JC, George, DT, Rallis-Frutos, D, Lyoo, CH, *et al.* (2013): Reduced cannabinoid CB1 receptor binding in alcohol dependence measured with positron emission tomography. *Mol Psychiatry* 18(8):916-21.
